# Supplementary material for: Endangered Uyghur Medicinal PlantFerulaIdentification through the Second Internal Transcribed Spacer
Source: Hindawi journal article supplement (doi:10.1155/2015/479879), 2015-01-01
Supplement: f1 [file 479879.f1.pdf]

Table S1. The species information of *Ferula* genus used in this study.

| Latin name                                    | Specimen voucher | Sample source            | Sampling parts | GenBank accession |
|-----------------------------------------------|------------------|--------------------------|----------------|-------------------|
| <i>Ferula sinkiangensis</i><br>K.M.Shen       | 7-x-z-7-1        | Yining County, Xinjiang  | leaves         | KF792984          |
|                                               | 7-x-z-7-2        | Yining County, Xinjiang  | leaves         | KF792985          |
|                                               | 7-x-z-7-3        | Jeminay County, Xinjiang | leaves         | KF792986          |
|                                               | 7-x-z-7-4        | Jeminay County, Xinjiang | leaves         | KF792987          |
|                                               | 7-x-z-7-5        | Yining County, Xinjiang  | leaves         | KF792988          |
|                                               | 7-x-z-8-2        | Yining County, Xinjiang  | leaves         | KF792995          |
|                                               | 7-x-z-7-6        | Yining County, Xinjiang  | roots          | KF792989          |
|                                               | 7-x-z-7-7        | Yining County, Xinjiang  | leaves         | KF792990          |
|                                               | 7-x-z-7-8        | Jeminay County, Xinjiang | leaves         | KF792991          |
|                                               | 7-x-z-7-9        | Jeminay County, Xinjiang | roots          | KF792992          |
|                                               | 7-x-z-7-10       | Yining County, Xinjiang  | leaves         | KF792993          |
|                                               | 7-x-z-8-1        | Yining County, Xinjiang  | leaves         | KF792994          |
|                                               | 13909            | Shawan, County, Xinjiang | roots          | KJ804121          |
| <i>Ferula fukanensis</i><br>K.M.Shen          | 7-x-z-3-2        | Fukang County, Xinjiang  | leaves         | KF793025          |
|                                               | 7-x-z-3-5        | Fukang County, Xinjiang  | leaves         | KF793027          |
|                                               | 7-x-z-3-4        | Fukang County, Xinjiang  | leaves         | KF793026          |
|                                               | 7-x-z-3-1        | Fukang County, Xinjiang  | roots          | KF793024          |
|                                               | 13113            | Fukang County, Xinjiang  | roots          | KJ804103          |
|                                               | 13114            | Fukang County, Xinjiang  | roots          | KJ804104          |
| <i>Ferula ferulaeoides</i><br>(Steud.) Korov. | 7-x-z-2-4        | Toli County, Xinjiang    | roots          | KF793002          |
|                                               | 7-x-z-2-5        | Toli County, Xinjiang    | leaves         | KF793003          |
|                                               | 7-x-z-2-6        | Fuyun County, Xinjiang   | leaves         | KF793004          |
|                                               | 7-x-z-2-7        | Fuyun County, Xinjiang   | leaves         | KF793005          |
|                                               | 7-x-z-2-8        | Fuyun County, Xinjiang   | leaves         | KF793006          |
|                                               | 7-x-z-2-9        | Toli County, Xinjiang    | leaves         | KF793007          |
|                                               | 7-x-z-2-10       | Shihezi City, Xinjiang   | leaves         | KF793008          |
|                                               | 7-x-z-2-11       | Shihezi City, Xinjiang   | leaves         | KF793009          |
|                                               | 7-x-z-2-13       | Toli County, Xinjiang    | leaves         | KF793010          |
|                                               | 7-x-z-2-15       | Toli County, Xinjiang    | leaves         | KF793011          |
|                                               | 7-x-z-2-15       | Yumin County, Xinjiang   | leaves         | KF793012          |
|                                               | 7-x-z-2-17       | Yumin County, Xinjiang   | leaves         | KF793014          |
|                                               | 7-x-z-2-16       | Qitai County, Xinjiang   | leaves         | KF793013          |
|                                               | 13912            | Yumin County, Xinjiang   | roots          | KJ804106          |
| <i>Ferula soongarica</i> Pall.<br>ex Spreng.  | 7-x-z-9-10       | Jeminay County, Xinjiang | root           | KF792997          |
|                                               | 7-x-z-9-9        | Toli County, Xinjiang    | root           | KF792996          |
|                                               | 7-x-z-9-11       | Wenquan County, Xinjiang | leaves         | KF792998          |
|                                               | 7-x-z-9-13       | Wenquan County, Xinjiang | leaves         | KF792999          |
|                                               | 7-x-z-9-15       | Jeminay County, Xinjiang | leaves         | KF793001          |
|                                               | 7-x-z-9-14       | Toli County, Xinjiang    | leaves         | KF793000          |

|                                             |            |                          |        |          |
|---------------------------------------------|------------|--------------------------|--------|----------|
| <i>Ferula caspica</i> M.B.                  | 7-s-y-9-2  | Toli County, Xinjiang    | leaves | KF793015 |
|                                             | 7-s-y-9-3  | Habahe County, Xinjiang  | leaves | KF793016 |
|                                             | 7-s-y-9-4  | Toli County, Xinjiang    | leaves | KF793017 |
|                                             | 7-s-y-9-12 | Habahe County, Xinjiang  | leaves | KF793036 |
|                                             | 7-s-y-9-6  | Toli County, Xinjiang    | leaves | KF793018 |
|                                             | 7-s-y-9-8  | Burqin County, Xinjiang  | roots  | KF793020 |
|                                             | 7-s-y-9-9  | Burqin County, Xinjiang  | leaves | KF793021 |
|                                             | 7-s-y-9-10 | Toli County, Xinjiang    | leaves | KF793022 |
|                                             | 7-s-y-9-11 | Fuyun County, Xinjiang   | leaves | KF793023 |
|                                             | 7-s-y-9-7  | Fuyun County, Xinjiang   | leaves | KF793019 |
|                                             | 13880      | Aletai city, Xinjiang    | roots  | KJ804105 |
|                                             |            |                          |        |          |
| <i>Ferula lehmannii</i> Boiss.              | 7-s-z-2-1  | Shawan County, Xinjiang  | leaves | KF793028 |
|                                             | 7-s-z-2-3  | Shawan County, Xinjiang  | leaves | KF793030 |
|                                             | 7-s-z-2-4  | Manas County, Xinjiang   | roots  | KF793031 |
|                                             | 7-s-z-2-5  | Shihezi City, Xinjiang   | leaves | KF793032 |
|                                             | 7-s-z-2-2  | Shihezi City, Xinjiang   | leaves | KF793029 |
|                                             |            |                          |        |          |
| <i>Ferula dubjanskyi</i> Korov.<br>ex Pavl. | 13889      | Fukang city, Xinjiang    | roots  | KJ804107 |
|                                             | 13891      | Buerjin County, Xinjiang | leaves | KJ804108 |
|                                             | 13911      | Fukang city, Xinjiang    | leaves | KJ804109 |
| <i>Ferula akitschkensis</i> B.<br>Fedtsen.  | 13855      | Habahe County, Xinjiang  | leaves | KJ804122 |
|                                             | 13854      | Yumin County, Xinjiang   | leaves | KJ804123 |
|                                             | 13853      | Aletai city, Xinjiang    | leaves | KJ804123 |
|                                             | 13852      | Tuoli County, Xinjiang   | roots  | KJ804125 |
|                                             |            |                          |        |          |
| <i>Ferula syreitschikowii</i><br>K.-Pol.    | 13883      | Manasi city, Xinjiang    | leaves | KJ804110 |
|                                             | 13857      | Manasi city, Xinjiang    | leaves | KJ804111 |
|                                             | 13861      | Urumqi city, Xinjiang    | leaves | KJ804112 |
|                                             | 13862      | Urumqi city, Xinjiang    | leaves | KJ804113 |
|                                             | 13865      | Urumqi city, Xinjiang    | leaves | KJ804114 |
|                                             | 13871      | Shawan County, Xinjiang  | leaves | KJ804115 |
|                                             | 13868      | Shawan County, Xinjiang  | leaves | KJ804116 |
|                                             | 13876      | Shihezi city, Xinjiang   | roots  | KJ804117 |
|                                             | 13885      | Shihezi city, Xinjiang   | roots  | KJ804117 |
|                                             | 13879      | Changji city, Xinjiang   | roots  | KJ804119 |
| <i>Ferula litwinowiana</i><br>Koso-Pol.     | 7-s-y-9-1  | Kazakhstan               | roots  | KF793035 |
|                                             |            | Genbank                  | unknow | DQ379423 |
